# Supplementary material for: The Price of Play: Self-Organized Infant Mortality Cycles in Chimpanzees
Source: PLoS One. 2008 Jun 18;3(6):e2440. doi: 10.1371/journal.pone.0002440 (PMC2426927; doi:10.1371/journal.pone.0002440)
Supplement: Table S1 — This file contains the full GLM results, from which only a selection is shown in the manuscript. (0.03 MB XLS) [file pone.0002440.s001.xls]

## Sheet: model_results
model	loglik	theta	constant	play	fai	mei	neonatal	weaning	#_parameters	AIC	AIC_weight	cumulative_AIC_weight
play+fai+mei	58.3641	204.652	-3.16693	1.26036	-4.89203	-0.196568	-	-	5	126.728	0.22162	0.22162
play+fai	59.3894	556.917	-0.808521	1.22662	-10.9221	-	-	-	4	126.779	0.216073	0.437693
play+fai+weaning	58.9041	1193.95	-3.76174	1.35633	-4.20357	-	-	0.332549	5	127.808	0.129147	0.56684
play+fai+mei+neonatal	58.2972	63.3074	-0.213877	1.26561	-12.9134	-0.231319	2.10361	-	6	128.594	0.087169	0.654008
play+fai+mei+weaning	58.3029	62.5924	-0.278599	1.28533	-12.4247	-0.206297		0.290354	6	128.606	0.0866742	0.740683
play+fai+weaning	59.3594	163.182	-0.36025	1.23673	-12.4546	-	1.37439	-	5	128.719	0.0819107	0.822593
play+fai+neonatal+weaning	58.8829	144.779	-3.7295	1.36172	-4.06282	-	-1.53916	0.323909	6	129.766	0.0485252	0.871119
play+fai+mei+neonatal+weaning	58.0143	21.2703	0.34493	1.3935	-15.1584	-0.245313	2.57832	0.362188	7	130.029	0.0425497	0.913668
play	62.6937	3.64622	-5.74524	1.37472	-	-	-	-	3	131.387	0.0215709	0.935239
play+mei	62.253	3.97482	-5.69959	1.39137	-	-0.167736	-	-	4	132.506	0.0123296	0.947569
play+neonatal	62.5271	3.79855	-5.57583	1.37928	-	-	-2.93192	-	4	133.054	0.00937408	0.956943
play+weaning	62.6159	3.79272	-5.8588	1.4137	-	-	-	0.245963	4	133.232	0.00857756	0.965521
play+mei+neonatal	62.0986	4.22268	-5.5236	1.39603	-	-0.165004	-3.10541	-	5	134.197	0.00529321	0.970814
fai	64.1208	3.54468	0.964199	-	-11.7992	-	-	-	3	134.242	0.00517715	0.975991
play+mei+weaning	62.2311	4.07228	-5.77258	1.4138	-	-0.159578	-	0.19223	5	134.462	0.00463615	0.980627
play+neonatal+weaning	62.4703	3.93688	-5.684	1.41284	-	-	-2.81545	0.223452	5	134.941	0.00365009	0.984277
fai+mei	63.5016	5.29853	0.884165	-	-11.3704	-0.204222	-	-	4	135.003	0.00353742	0.987815
fai+neonatal	64.053	3.37883	1.15533	-	-12.6583	-	1.47949	-	4	136.106	0.00203818	0.989853
fai+weaning	64.0623	3.63021	1.21088	-	-12.1833	-	-	-1.69666	4	136.125	0.00201915	0.991872
play+mei+neonatal+weaning	62.089	4.3033	-5.58413	1.41254	-	-0.158654	-3.0564	0.159214	6	136.178	0.00196595	0.993838
fai+mei+neonatal	63.3747	4.93246	1.08954	-	-12.3826	-0.218915	1.87817	-	5	136.749	0.0014774	0.995315
fai+mei+weaning	63.4221	5.48556	1.09474	-	-11.6752	-0.20705	-	-1.53542	5	136.844	0.00140906	0.996724
fai+neonatal+weaning	63.9698	3.21984	1.50733	-	-13.8196	-	1.78534	0.270616	5	137.94	0.000814849	0.997539
null	67.148	1.50805	-4.18719	-	-	-	-	-	2	138.296	0.000681814	0.998221
fai+mei+neonatal+weaning	63.343	5.18925	1.19782	-	-12.42	-0.218338	1.63027	-1.04652	6	138.686	0.000561052	0.998782
mei	66.9618	1.57162	-4.14111	-	-	-0.121501	-	-	3	139.924	0.000302178	0.999084
neonatal	67.0601	1.539	-4.06363	-	-	-	-1.97494	-	3	140.12	0.000273871	0.999358
weaning	67.1277	1.51241	-4.1493	-	-	-	-	-0.449192	3	140.255	0.00025598	0.999614
mei+neonatal	66.8848	1.60263	-4.02353	-	-	-0.117627	-1.89025		4	141.77	0.000120063	0.999734
mei+weaning	66.9277	1.57855	-4.09578	-	-	-0.125887	-	-0.545688	4	141.855	0.00011502	0.999849
neonatal+weaning	67.0248	1.54677	-4.00155	-	-	-	-2.12823	-0.635892	4	142.05	0.00010437	0.999954
mei+neonatal+weaning	66.8336	1.61335	-3.95166	-	-	-0.122721	-2.08984	-0.727182	5	143.667	4.64876e-05	1
column_name	explanation
model	variables in the model
loglik	log likelihood
theta	shape parameter of negative binomial error function
constant	constant in the model
play	playindex
fai	fruit availability index
mei	multivariate el nino southern oscillation index
neonatal	variable for neonatal mortality
weaning	variable for mortality around weaning
#_parameters	number of parameters, including theta
AIC	Akaikes information criterion (AIC=2*loglik+2*#_parameters)
AIC_weight	exp(-0.5*(AIC-min(AIC)))
cumulative_AIC_weight	cumulative AIC_weight

## Sheet: column_names
column_name	explanation
model	variables in the model
loglik	log likelihood
theta	shape parameter of negative binomial error function
constant	constant in the model
play	playindex
fai	fruit availability index
mei	multivariate el nino southern oscillation index
neonatal	variable for neonatal mortality
weaning	variable for mortality around weaning
#_parameters	number of parameters, including theta
AIC	Akaikes information criterion (AIC=2*loglik+2*#_parameters)
AIC_weight	exp(-0.5*(AIC-min(AIC)))
cumulative_AIC_weight	cumulative AIC_weight
